# Supplementary material for: Pooled analysis of tanezumab efficacy and safety with subgroup analyses of phase III clinical trials in patients with osteoarthritis pain of the knee or hip
Source: PubMed Central journal article supplement — J Pain Res. 2019 Mar 19;12:975–95. doi: 10.2147/JPR.S191297 (PMC6430070; doi:10.2147/jpr.s191297), 2019-03-19
Supplement: JPR-12-975-191297.pdf [file JPR-12-975-191297.pdf]

**Supplemental Table 1.** Studies included in the pooled analyses.

| Study number<br>(clinical trial<br>registration;<br>date of<br>registration) | Pooled<br>analyses | Treatment<br>duration | Treatments*                                                                  | Inclusion Criteria                                                                                                                                                                                                                                                                                                                                                                                                                                                                                                                                                                      | Exclusion Criteria                                                                                                                                                                                                                                                                   |
|------------------------------------------------------------------------------|--------------------|-----------------------|------------------------------------------------------------------------------|-----------------------------------------------------------------------------------------------------------------------------------------------------------------------------------------------------------------------------------------------------------------------------------------------------------------------------------------------------------------------------------------------------------------------------------------------------------------------------------------------------------------------------------------------------------------------------------------|--------------------------------------------------------------------------------------------------------------------------------------------------------------------------------------------------------------------------------------------------------------------------------------|
| A4091011<br>(NCT00733902;<br>August 11, 2008)                                | Efficacy<br>Safety | 24 weeks              | Tanezumab 2.5 mg IV<br>Tanezumab 5 mg IV<br>Tanezumab 10 mg IV<br>Placebo IV | Diagnosis of OA of the knee according to ACR criteria and X-ray confirmation taken within the previous 12 months with KL X-ray grade >2, and ≥1 of the following: unwillingness or inability to take non-opiate pain medications, inadequate pain relief from non-opiate pain medications, or candidacy for invasive interventions such as intra-articular injections, knee arthroplasty, or knee replacement surgery; WOMAC <sup>†</sup> Pain subscale score in the index knee ≥4 at screening and ≥5 at baseline and, in pts who washed out of regularly taken pain medications after | Pregnant or intended to become pregnant during the study; had BMI >39 kg/m <sup>2</sup> ; pain syndromes that could confound assessment of pain from OA (eg, fibromyalgia, systemic lupus erythematosus, or others); or significant cardiac, neurologic, or psychological conditions |

|                                                        |                                 |                 |                                                                                                       |                                                                                                                                                                                                                                                                                                                                                                                                                                                                                                                                                                                                                                           |                                                                                                                                                                                                                                                                                           |
|--------------------------------------------------------|---------------------------------|-----------------|-------------------------------------------------------------------------------------------------------|-------------------------------------------------------------------------------------------------------------------------------------------------------------------------------------------------------------------------------------------------------------------------------------------------------------------------------------------------------------------------------------------------------------------------------------------------------------------------------------------------------------------------------------------------------------------------------------------------------------------------------------------|-------------------------------------------------------------------------------------------------------------------------------------------------------------------------------------------------------------------------------------------------------------------------------------------|
|                                                        |                                 |                 |                                                                                                       | <p>screening, an increase <math>\geq 1</math> from screening to baseline; WOMAC Physical Function subscale score <math>\geq 4</math> at baseline; PGA of OA<sup>†</sup> of “fair,” “poor,” or “very poor,” at baseline</p>                                                                                                                                                                                                                                                                                                                                                                                                                |                                                                                                                                                                                                                                                                                           |
| <p>A4091014<br/>(NCT00744471;<br/>August 29, 2008)</p> | <p>Efficacy<br/><br/>Safety</p> | <p>24 weeks</p> | <p>Tanezumab 2.5 mg IV<br/><br/>Tanezumab 5 mg IV<br/><br/>Tanezumab 10 mg IV<br/><br/>Placebo IV</p> | <p>OA of the hip; <math>\geq 1</math> of the following:<br/>unwillingness or inability to take non-opiate pain medications, inadequate pain relief from non-opiate pain medications, or candidacy for invasive interventions such as intraarticular injections or hip surgery such as total joint replacement;<br/>WOMAC pain subscale score of 4 at screening and 5 at baseline, and an increase of 1 from screening to baseline if they had been regularly taking pain medications prior to screening and were required to wash out prior to baseline;<br/>WOMAC physical function subscale score of 4 at baseline was required for</p> | <p>Pregnant or intended to become pregnant during the study; had BMI <math>&gt;39</math> kg/m<sup>2</sup>; moderate to severe pain other than that related to OA; any condition that could confound OA pain assessment; or significant cardiac, neurologic, or psychiatric conditions</p> |

|                                                             |                                 |                 |                                                                                                                                         |                                                                                                                                                                                                                                                                                                                                                                                                                                                                                                                                                                    |                                                                                                                                                                                                                                                  |
|-------------------------------------------------------------|---------------------------------|-----------------|-----------------------------------------------------------------------------------------------------------------------------------------|--------------------------------------------------------------------------------------------------------------------------------------------------------------------------------------------------------------------------------------------------------------------------------------------------------------------------------------------------------------------------------------------------------------------------------------------------------------------------------------------------------------------------------------------------------------------|--------------------------------------------------------------------------------------------------------------------------------------------------------------------------------------------------------------------------------------------------|
|                                                             |                                 |                 |                                                                                                                                         | <p>the hip being studied (ie, the index hip);</p> <p>PGA of OA disease activity as “fair,”</p> <p>“poor,” or “very poor” at baseline was also required</p>                                                                                                                                                                                                                                                                                                                                                                                                         |                                                                                                                                                                                                                                                  |
| <p>A4091015<br/>(NCT00830063;<br/>January 23,<br/>2009)</p> | <p>Efficacy<br/><br/>Safety</p> | <p>16 weeks</p> | <p>Tanezumab 5 mg IV<br/>Tanezumab 10 mg IV<br/>Naproxen 500 mg BID<br/><br/>PO<br/><br/>Placebo matching<br/><br/>active PO and IV</p> | <p>Aged ≥18 years, BMI ≤39 kg/m<sup>2</sup> and diagnosis of knee OA based on the ACR criteria and radiographic confirmation (KL grade ≥2). At screening, eligible pts reported WOMAC Pain score ≥4 in the index joint, with or without analgesic medication. At baseline, pts had to report WOMAC Pain score ≥5 with an increase ≥1 point from screening if they had regularly taken medications (≥4 days.wk) during the month prior to screening; WOMAC Physical Function score ≥4; and a response of fair, poor, or very poor on PGA of OA to be randomized</p> | <p>Key exclusion criteria were similar to studies A4091011 and A4091014, but also included a history of naproxen intolerance, or existence of a medical condition or the use of concomitant medication for which naproxen is contraindicated</p> |

|                                                       |               |                 |                                                                                                                                                                                                                                        |                                                                                                                                                                                                                                                                                                                                                                                                                                                                                                                                                                                                                                                                                                                                                                                                                                                         |                                                                                                                                                                                                                                                                                                                                                                                                                                                                                                                                                                                                                                                                                                        |
|-------------------------------------------------------|---------------|-----------------|----------------------------------------------------------------------------------------------------------------------------------------------------------------------------------------------------------------------------------------|---------------------------------------------------------------------------------------------------------------------------------------------------------------------------------------------------------------------------------------------------------------------------------------------------------------------------------------------------------------------------------------------------------------------------------------------------------------------------------------------------------------------------------------------------------------------------------------------------------------------------------------------------------------------------------------------------------------------------------------------------------------------------------------------------------------------------------------------------------|--------------------------------------------------------------------------------------------------------------------------------------------------------------------------------------------------------------------------------------------------------------------------------------------------------------------------------------------------------------------------------------------------------------------------------------------------------------------------------------------------------------------------------------------------------------------------------------------------------------------------------------------------------------------------------------------------------|
| <p>A4091017<br/>(NCT00864097;<br/>March 17, 2009)</p> | <p>Safety</p> | <p>24 weeks</p> | <p>Tanezumab 2.5 mg IV<br/>+ diclofenac SR 75 mg<br/>BID PO<br/>Tanezumab 5 mg IV +<br/>diclofenac SR 75 mg<br/>BID PO<br/>Tanezumab 10 mg IV<br/>+ diclofenac SR 75 mg<br/>BID PO<br/>Diclofenac SR 75 mg<br/>BID PO + placebo IV</p> | <p>≥18 years old, BMI ≤39 kg/m<sup>2</sup> and a<br/>diagnosis of knee or hip OA based on<br/>ACR criteria for OA with radiographic<br/>confirmation (KL grade ≥2). Pts had to<br/>take a current stable oral regimen of<br/>diclofenac 150 mg/day ≥5 days per week<br/>during the 30 days before screening,<br/>tolerate the diclofenac daily regimen, and<br/>experience some benefit from this<br/>regimen but require additional pain relief.<br/>At screening, pts had to report moderate<br/>to severe pain despite diclofenac use,<br/>defined as a score of ≥4 on the WOMAC<br/>Pain subscale. Pts initiated diclofenac SR<br/>75 mg BID at screening and must be at<br/>least 70% compliant the final 14 days<br/>prior to baseline. In addition, pts had to<br/>report a score ≥4 on WOMAC Pain and<br/>Physical Function subscales and a</p> | <p>Pain syndromes or index joint conditions<br/>that could confound OA pain assessment;<br/>history of significant trauma or surgery to<br/>the index joint within the previous year or<br/>planned surgical procedure during the<br/>study; largely or wholly incapacitated;<br/>significant cardiac, neurologic or psychiatric<br/>conditions; oral, intramuscular or intra-<br/>articular corticosteroids within 30 days, 30<br/>days or 12 weeks, respectively; previous<br/>exposure to exogenous NGF or an anti-<br/>NGF antibody; history of reaction to a<br/>monoclonal antibody or IgG fusion protein;<br/>or use of biologics within 3 months of the<br/>initial pain assessment period</p> |
|-------------------------------------------------------|---------------|-----------------|----------------------------------------------------------------------------------------------------------------------------------------------------------------------------------------------------------------------------------------|---------------------------------------------------------------------------------------------------------------------------------------------------------------------------------------------------------------------------------------------------------------------------------------------------------------------------------------------------------------------------------------------------------------------------------------------------------------------------------------------------------------------------------------------------------------------------------------------------------------------------------------------------------------------------------------------------------------------------------------------------------------------------------------------------------------------------------------------------------|--------------------------------------------------------------------------------------------------------------------------------------------------------------------------------------------------------------------------------------------------------------------------------------------------------------------------------------------------------------------------------------------------------------------------------------------------------------------------------------------------------------------------------------------------------------------------------------------------------------------------------------------------------------------------------------------------------|

|                                                    |                        |          |                                                                                                                          |                                                                                                                                                                                                                                                                                                                                                                                                                                                                                                                                                                                                   |                                                                                                                                                                                                                                           |
|----------------------------------------------------|------------------------|----------|--------------------------------------------------------------------------------------------------------------------------|---------------------------------------------------------------------------------------------------------------------------------------------------------------------------------------------------------------------------------------------------------------------------------------------------------------------------------------------------------------------------------------------------------------------------------------------------------------------------------------------------------------------------------------------------------------------------------------------------|-------------------------------------------------------------------------------------------------------------------------------------------------------------------------------------------------------------------------------------------|
|                                                    |                        |          |                                                                                                                          | response of fair, poor or very poor on<br>PGA of OA at baseline                                                                                                                                                                                                                                                                                                                                                                                                                                                                                                                                   |                                                                                                                                                                                                                                           |
| A4091018<br>(NCT00863304;<br>March 13, 2009)       | Efficacy<br><br>Safety | 16 weeks | Tanezumab 5 mg IV<br>Tanezumab 10 mg IV<br>Naproxen 500 mg BID<br><br>PO<br><br>Placebo matching<br><br>active PO and IV | Aged $\geq 18$ years, BMI $\leq 39$ kg/m <sup>2</sup> and diagnosis of hip or knee OA based on the ACR criteria and radiographic confirmation (KL grade $\geq 2$ ). At screening, eligible pts reported WOMAC Pain score $\geq 4$ in the index joint, with or without analgesic medication. At baseline, had to report WOMAC Pain score $\geq 5$ with an increase $\geq 1$ point from screening if they had regularly taken medications ( $\geq 4$ days/wk) during the month prior to screening; WOMAC Physical Function score $\geq 4$ ; and a response of fair, poor, or very poor on PGA of OA | Key exclusion criteria were similar to studies A4091011 and A4091014, but also included a history of naproxen intolerance, or existence of a medical condition or the use of concomitant medication for which naproxen is contraindicated |
| A4091025<br>(NCT00809354;<br>December 16,<br>2008) | Safety                 | 56 weeks | NSAID (celecoxib 100<br><br>mg PO BID or<br>naproxen 500 mg PO<br><br>BID) + placebo IV                                  | $\geq 18$ years old, diagnosis of knee or hip OA based on ACR criteria with radiographic confirmation (KL grade $\geq 2$ ), BMI $\leq 39$ kg/m <sup>2</sup> , taking stable oral NSAID                                                                                                                                                                                                                                                                                                                                                                                                            | Similar to other tanezumab trials but also included any abnormality that would preclude continued NSAID therapy, including country-specific restrictive                                                                                   |

|  |  |  |                                                                                                                                                                                                                                                      |                                                                                                                                                                                                                                                                                                                                                                                                                                                                                                                                                                                                                                                                                                                                                                                                                                        |                                                                                     |
|--|--|--|------------------------------------------------------------------------------------------------------------------------------------------------------------------------------------------------------------------------------------------------------|----------------------------------------------------------------------------------------------------------------------------------------------------------------------------------------------------------------------------------------------------------------------------------------------------------------------------------------------------------------------------------------------------------------------------------------------------------------------------------------------------------------------------------------------------------------------------------------------------------------------------------------------------------------------------------------------------------------------------------------------------------------------------------------------------------------------------------------|-------------------------------------------------------------------------------------|
|  |  |  | <p>Tanezumab 5 mg IV + placebo PO</p> <p>Tanezumab 5 mg IV +NSAID (celecoxib 100 mg PO BID or naproxen 500 mg PO BID)</p> <p>Tanezumab 10 mg IV +placebo PO</p> <p>Tanezumab 10 mg IV +NSAID (celecoxib 100 mg PO BID or naproxen 500 mg PO BID)</p> | <p>(naproxen [500–1000 mg/day] or celecoxib [200 mg/day]) for their OA pain for a minimum of 30 days prior to screening, and experiencing at least some analgesic benefit from the NSAID in the opinion of the investigator. Pts were required to report WOMAC Pain score <math>\geq 4</math> at screening. To be eligible for randomization, required to report WOMAC Pain score <math>\geq 4</math>; WOMAC Physical Function score <math>\geq 4</math>; overall condition of fair, poor or very poor on the PGA of OA at baseline; and have at least 70% compliance with study-supplied oral NSAID treatment over at least 14 days directly prior to baseline. Since pts were required to continue stable oral NSAID use prior to randomization, they were not required to report a worsening WOMAC Pain score (ie, no “flare”).</p> | <p>exclusion criteria for naproxen or celecoxib use in pts with cardiac disease</p> |
|--|--|--|------------------------------------------------------------------------------------------------------------------------------------------------------------------------------------------------------------------------------------------------------|----------------------------------------------------------------------------------------------------------------------------------------------------------------------------------------------------------------------------------------------------------------------------------------------------------------------------------------------------------------------------------------------------------------------------------------------------------------------------------------------------------------------------------------------------------------------------------------------------------------------------------------------------------------------------------------------------------------------------------------------------------------------------------------------------------------------------------------|-------------------------------------------------------------------------------------|

|                                                       |               |                 |                                                                                                                      |                                                                                                                                                                                                                                                                                                                 |                                                                                                                                                                                                                                                                                                                                                                                                                                                                                               |
|-------------------------------------------------------|---------------|-----------------|----------------------------------------------------------------------------------------------------------------------|-----------------------------------------------------------------------------------------------------------------------------------------------------------------------------------------------------------------------------------------------------------------------------------------------------------------|-----------------------------------------------------------------------------------------------------------------------------------------------------------------------------------------------------------------------------------------------------------------------------------------------------------------------------------------------------------------------------------------------------------------------------------------------------------------------------------------------|
| <p>A4091026<br/>(NCT00863772;<br/>March 17, 2009)</p> | <p>Safety</p> | <p>24 weeks</p> | <p>Tanezumab 5 mg IV<br/>Tanezumab 10 mg IV<br/>Placebo IV</p>                                                       | <p>≥18 years with diagnosis of knee or hip OA based on ACR criteria; WOMAC Pain subscale score ≥4 for the index joint at screening and baseline; and PGA of OA of fair, poor, or very poor at baseline</p>                                                                                                      | <p>Signs of baseline peripheral neuropathy based on pre-specified NC and heart rate deep breathing parameters; abnormal baseline neurologic examination; pregnancy; BMI &gt;39 kg/m<sup>2</sup>; other moderate to severe pain that could confound assessments of OA pain; significant heart disease, cancer, neurologic or psychiatric disease; or clinically significant systemic disease that could confound interpretation of NC tests, autonomic testing, or skin biopsy assessments</p> |
| <p>A4091027<br/>(NCT01089725;<br/>March 11, 2010)</p> | <p>Safety</p> | <p>16 weeks</p> | <p>Tanezumab 2.5 mg SC<br/>Tanezumab 5 mg SC<br/>Tanezumab 10 mg SC<br/>Tanezumab 10 mg IV<br/>Placebo IV and SC</p> | <p>≥18 years old with diagnosis of OA of the knee based on ACR criteria and radiographic confirmation (KL X-ray grade ≥2); and WOMAC Pain score in the index knee at screening ≥4 and ≥5 at baseline. Pts regularly taking pain medications (≥4 days/wk) during the month prior to screening had to have an</p> | <p>Pregnancy, nursing, or intent to become pregnant during the study; BMI &gt;39 kg/m<sup>2</sup>; history of joint disease or recent trauma to the index knee; significant incapacitation, fibromyalgia, or regional pain caused by lumbosacral radiculopathy; significant cardiac, neurologic, or psychiatric conditions; planned surgery during the</p>                                                                                                                                    |

|                                                               |               |                 |                                                                                                                          |                                                                                                                                                                                                                                                                                                                                                                                                                                                                                                                                           |                                                                                                                                                                                                                                                                                                                                                                         |
|---------------------------------------------------------------|---------------|-----------------|--------------------------------------------------------------------------------------------------------------------------|-------------------------------------------------------------------------------------------------------------------------------------------------------------------------------------------------------------------------------------------------------------------------------------------------------------------------------------------------------------------------------------------------------------------------------------------------------------------------------------------------------------------------------------------|-------------------------------------------------------------------------------------------------------------------------------------------------------------------------------------------------------------------------------------------------------------------------------------------------------------------------------------------------------------------------|
|                                                               |               |                 |                                                                                                                          | <p>increase <math>\geq 1</math> point in WOMAC Pain score between screening and baseline. Pts had WOMAC Physical Function score <math>\geq 4</math> in index knee; PGA of OA of "fair," "poor," or "very poor" at baseline; and <math>\geq 1</math> of the following: unwilling or unable to take non-opiate pain medications (eg, NSAIDs); inadequate pain relief with non-opiate pain medications; or candidates for or seeking invasive interventions (intra-articular injections, knee arthroplasty, or knee replacement surgery)</p> | <p>study; or previous exposure to exogenous NGF or NGF antibody</p>                                                                                                                                                                                                                                                                                                     |
| <p>A4091030<br/>(NCT00985621;<br/>September 25,<br/>2009)</p> | <p>Safety</p> | <p>16 weeks</p> | <p>Tanezumab 5 mg IV<br/>Tanezumab 10 mg IV<br/>Oxycodone CR 10 - 40 mg PO BID<br/>Placebo matching active PO and IV</p> | <p>OA of the hip or knee with KL grade <math>\geq 2</math>;<br/>WOMAC Pain score <math>\geq 4</math> at screening;<br/>WOMAC Pain score <math>\geq 5</math> at baseline and an increase of <math>\geq 1</math> following washout of prior analgesic treatment; WOMAC Physical Function score <math>\geq 4</math>; PGA of OA of fair, poor, or very poor at baseline; and regular use of analgesics other than</p>                                                                                                                         | <p>Pregnancy, nursing, or intent to become pregnant during the study; BMI <math>&gt;39</math> kg/m<sup>2</sup>; history of joint disease or recent trauma to the index joint; significant incapacitation, fibromyalgia or regional pain caused by lumbosacral radiculopathy; significant cardiac, neurologic, or psychiatric conditions; planned surgery during the</p> |



|  |  |  |  |                                                                                                                                                                                                                                                                                                                   |                                                                                                                                                                                                                                                                                                                                                                                                                                                                                                                                                                                                                                                                                                                                                                                                        |
|--|--|--|--|-------------------------------------------------------------------------------------------------------------------------------------------------------------------------------------------------------------------------------------------------------------------------------------------------------------------|--------------------------------------------------------------------------------------------------------------------------------------------------------------------------------------------------------------------------------------------------------------------------------------------------------------------------------------------------------------------------------------------------------------------------------------------------------------------------------------------------------------------------------------------------------------------------------------------------------------------------------------------------------------------------------------------------------------------------------------------------------------------------------------------------------|
|  |  |  |  | <p>acetaminophen for OA pain. In addition, eligible patients had to use non-opioids or opioids up to 90 mg/day in morphine equivalents, but this therapy had not provided adequate pain relief, had not been tolerated, or pt was a candidate for invasive intervention such as total hip or knee replacement</p> | <p>study; opioid abuse or illicit drug use; previous exposure to exogenous NGF or NGF antibody; exposure to opioids in doses exceeding 90 mg/day in morphine equivalents (ie, oxycodone &gt;60 mg/day) within 30 days prior to screening; history of allergic or anaphylactic reaction to a monoclonal antibody or IgG type-fusion protein; history of intolerance or hypersensitivity to acetaminophen or oxycodone; an existing medical condition for which the use of oxycodone was contraindicated; corticosteroids or intraarticular hyaluronic acid injection to the index hip or index knee within 30 days prior to the initial pain assessment period (the 5 days before randomization); and any other condition, which, in the opinion of the investigator, would put the pt at increased</p> |
|--|--|--|--|-------------------------------------------------------------------------------------------------------------------------------------------------------------------------------------------------------------------------------------------------------------------------------------------------------------------|--------------------------------------------------------------------------------------------------------------------------------------------------------------------------------------------------------------------------------------------------------------------------------------------------------------------------------------------------------------------------------------------------------------------------------------------------------------------------------------------------------------------------------------------------------------------------------------------------------------------------------------------------------------------------------------------------------------------------------------------------------------------------------------------------------|

|  |  |  |  |  |                                                                     |
|--|--|--|--|--|---------------------------------------------------------------------|
|  |  |  |  |  | safety risk or would otherwise make the pt unsuitable for the study |
|--|--|--|--|--|---------------------------------------------------------------------|

\*Tanezumab/placebo was administered via IV or SC injection every 8 weeks.

† WOMAC is assessed on an 11-point numeric rating scale (greater scores represent greater pain intensity/worsening physical function)

‡ PGA of OA is assessed on a 5-point scale (1 = very good, 5 = very poor)

ACR, American College of Rheumatology; BID, twice a day; BMI, body mass index; CR, controlled release; Ig, immunoglobulin; IV, intravenous; KL, Kellgren-Lawrence; NC, nerve conduction; NGF, nerve growth factor; NSAIDs, non-steroidal anti-inflammatory drugs; OA, osteoarthritis; PGA, Patient's Global Assessment; PO, oral; pt, patient; SC, subcutaneous; WOMAC, Western Ontario and McMaster Universities Osteoarthritis Index.

**Table S2** Baseline demographics for four phase III OA studies pooled for analysis of efficacy

|                                        | Placebo         | Tanezumab       | Tanezumab       | Tanezumab       | Naproxen        |
|----------------------------------------|-----------------|-----------------|-----------------|-----------------|-----------------|
|                                        |                 | 2.5 mg          | 5 mg            | 10 mg           | 500mg BID       |
| Overall                                | n=744           | n=327           | n=743           | n=748           | n=417           |
| Female, n (%)                          | 478 (64.2)      | 195 (59.6)      | 449 (60.4)      | 450 (60.2)      | 265 (63.5)      |
| Age, years, mean $\pm$ SD              | 61.2 $\pm$ 10.0 | 61.6 $\pm$ 10.1 | 61.1 $\pm$ 10.5 | 61.1 $\pm$ 10.6 | 60.8 $\pm$ 10.2 |
| BMI, kg/m <sup>2</sup> , mean $\pm$ SD | 30.6 $\pm$ 4.8  | 30.2 $\pm$ 5.2  | 30.4 $\pm$ 4.9  | 30.3 $\pm$ 5.1  | 30.8 $\pm$ 4.7  |
| Race, n (%)                            |                 |                 |                 |                 |                 |
| White                                  | 636 (85.5)      | 282 (86.2)      | 643 (86.5)      | 633 (84.6)      | 352 (84.4)      |
| Black                                  | 83 (11.2)       | 37 (11.3)       | 88 (11.8)       | 86 (11.5)       | 54 (12.9)       |
| Asian                                  | 9 (1.2)         | 3 (0.9)         | 4 (0.5)         | 10 (1.3)        | 7 (1.7)         |
| Other                                  | 16 (2.2)        | 5 (1.5)         | 8 (1.1)         | 19 (2.5)        | 4 (1.0)         |
| Diabetes <sup>‡</sup>                  | n= 88           | n= 50           | n= 90           | n= 75           | n= 60           |
| Female, n (%)                          | 49 (55.7)       | 28 (56.0)       | 49 (54.4)       | 46 (61.3)       | 28 (46.7)       |
| Age, years, mean $\pm$ SD              | 63.6 $\pm$ 10.3 | 64.3 $\pm$ 7.8  | 65.5 $\pm$ 8.4  | 62.2 $\pm$ 9.5  | 62.5 $\pm$ 8.7  |
| BMI, kg/m <sup>2</sup> , mean $\pm$ SD | 32.5 $\pm$ 3.8  | 32.6 $\pm$ 4.6  | 32.7 $\pm$ 4.3  | 32.5 $\pm$ 4.6  | 32.0 $\pm$ 4.4  |
| Race, n (%)                            |                 |                 |                 |                 |                 |
| White                                  | 73 (83.0)       | 41 (82.0)       | 79 (87.8)       | 65 (86.7)       | 51 (85.0)       |
| Black                                  | 12 (13.6)       | 6 (12.0)        | 9 (10.0)        | 8 (10.7)        | 7 (11.7)        |
| Asian                                  | 1 (1.1)         | 2 (4.0)         | 0               | 1 (1.3)         | 1 (1.7)         |
| Other                                  | 2 (2.3)         | 1 (2.0)         | 2 (2.2)         | 1 (1.3)         | 1 (1.7)         |
| No diabetes                            | n= 656          | n= 277          | n= 653          | n= 673          | n= 357          |
| Female, n (%)                          | 429 (65.4)      | 167 (60.3)      | 400 (61.3)      | 404 (60.0)      | 237 (66.4)      |
| Age, years, mean $\pm$ SD              | 60.9 $\pm$ 10.0 | 61.1 $\pm$ 10.4 | 60.5 $\pm$ 10.6 | 61.0 $\pm$ 10.7 | 60.5 $\pm$ 10.5 |
| BMI, kg/m <sup>2</sup> , mean $\pm$ SD | 30.3 $\pm$ 4.8  | 29.8 $\pm$ 5.2  | 30.1 $\pm$ 4.8  | 30.0 $\pm$ 5.1  | 30.6 $\pm$ 4.7  |
| Race, n (%)                            |                 |                 |                 |                 |                 |
| White                                  | 563 (85.8)      | 241 (87.0)      | 564 (86.4)      | 568 (84.4)      | 301 (84.3)      |
| Black                                  | 71 (10.8)       | 31 (11.2)       | 79 (12.1)       | 78 (11.6)       | 47 (13.2)       |
| Asian                                  | 8 (1.2)         | 1 (0.4)         | 4 (0.6)         | 9 (1.3)         | 6 (1.7)         |
| Other                                  | 14 (2.1)        | 4 (1.4)         | 6 (0.9)         | 18 (2.7)        | 3 (0.8)         |

|                                             |                |                 |                 |                 |                 |
|---------------------------------------------|----------------|-----------------|-----------------|-----------------|-----------------|
| Severe OA symptoms at baseline <sup>§</sup> | n= 192         | n= 88           | n= 179          | n= 170          | n= 113          |
| Female, n (%)                               | 134 (69.8)     | 56 (63.6)       | 129 (72.1)      | 112 (65.9)      | 80 (70.8)       |
| Age, years, mean $\pm$ SD                   | 61.0 $\pm$ 9.5 | 60.9 $\pm$ 10.9 | 59.2 $\pm$ 10.2 | 60.1 $\pm$ 10.0 | 60.4 $\pm$ 10.5 |
| BMI, kg/m <sup>2</sup> , mean $\pm$ SD      | 31.7 $\pm$ 4.5 | 31.7 $\pm$ 4.7  | 31.4 $\pm$ 4.9  | 31.1 $\pm$ 5.0  | 31.4 $\pm$ 4.9  |
| Race, n (%)                                 |                |                 |                 |                 |                 |
| White                                       | 154 (80.2)     | 77 (87.5)       | 149 (83.2)      | 131 (77.1)      | 92 (81.4)       |
| Black                                       | 26 (13.5)      | 11 (12.5)       | 26 (14.5)       | 30 (17.6)       | 18 (15.9)       |
| Asian                                       | 1 (0.5)        | 0               | 1 (0.6)         | 1 (0.6)         | 1 (0.9)         |
| Other                                       | 11 (5.7)       | 0               | 3 (1.7)         | 8 (4.7)         | 2 (1.8)         |
| Less severe OA symptoms at baseline         | n= 192         | n= 88           | n= 179          | n= 170          | n= 113          |
| Female, n (%)                               | 134 (69.8)     | 56 (63.6)       | 129 (72.1)      | 112 (65.9)      | 80 (70.8)       |
| Age, years, mean $\pm$ SD                   | 61.0 $\pm$ 9.5 | 60.9 $\pm$ 10.9 | 59.2 $\pm$ 10.2 | 60.1 $\pm$ 10.0 | 60.4 $\pm$ 10.5 |
| BMI, kg/m <sup>2</sup> , mean $\pm$ SD      | 30.0 $\pm$ 4.8 | 31.7 $\pm$ 4.7  | 31.4 $\pm$ 4.9  | 31.1 $\pm$ 5.0  | 31.4 $\pm$ 4.9  |
| Race, n (%)                                 |                |                 |                 |                 |                 |
| White                                       | 154 (80.2)     | 77 (87.5)       | 149 (83.2)      | 131 (77.1)      | 92 (81.4)       |
| Black                                       | 26 (13.5)      | 11 (12.5)       | 26 (14.5)       | 30 (17.6)       | 18 (15.9)       |
| Asian                                       | 1 (0.5)        | 0               | 1 (0.6)         | 1 (0.6)         | 1 (0.9)         |
| Other                                       | 11 (5.7)       | 0               | 3 (1.7)         | 8 (4.7)         | 2 (1.8)         |
| Aged $\geq$ 65 years                        | n= 275         | n= 124          | n= 269          | n= 268          | n= 151          |
| Female, n (%)                               | 175 (63.6)     | 73 (58.9)       | 159 (59.1)      | 169 (63.1)      | 107 (70.9)      |
| Age, years, mean $\pm$ SD                   | 71.5 $\pm$ 5.5 | 71.6 $\pm$ 5.2  | 71.8 $\pm$ 5.4  | 72.3 $\pm$ 5.8  | 71.5 $\pm$ 5.4  |
| BMI, kg/m <sup>2</sup> , mean $\pm$ SD      | 29.9 $\pm$ 4.6 | 30.1 $\pm$ 4.8  | 29.8 $\pm$ 4.8  | 29.4 $\pm$ 4.9  | 30.1 $\pm$ 4.5  |
| Race, n (%)                                 |                |                 |                 |                 |                 |
| White                                       | 246 (89.5)     | 112 (90.3)      | 242 (90.0)      | 238 (88.8)      | 136 (90.1)      |
| Black                                       | 25 (9.1)       | 11 (8.9)        | 23 (8.6)        | 23 (8.6)        | 13 (8.6)        |
| Asian                                       | 2 (0.7)        | 0               | 1 (0.4)         | 2 (0.7)         | 2 (1.3)         |
| Other                                       | 2 (0.7)        | 1 (0.8)         | 3 (1.1)         | 5 (1.9)         | 0               |
| Aged <65 years                              | n= 469         | n= 203          | n= 474          | n= 480          | n= 266          |
| Female, n (%)                               | 303 (64.6)     | 122 (60.1)      | 290 (61.2)      | 281 (58.5)      | 155 (58.3)      |

|                                        |                |                |                |                |                |
|----------------------------------------|----------------|----------------|----------------|----------------|----------------|
| Age, years, mean $\pm$ SD              | 55.1 $\pm$ 6.5 | 55.5 $\pm$ 6.9 | 55.0 $\pm$ 7.2 | 54.9 $\pm$ 6.8 | 54.8 $\pm$ 6.9 |
| BMI, kg/m <sup>2</sup> , mean $\pm$ SD | 30.9 $\pm$ 4.8 | 30.3 $\pm$ 5.5 | 30.7 $\pm$ 4.9 | 30.8 $\pm$ 5.1 | 31.2 $\pm$ 4.7 |
| Race, n (%)                            |                |                |                |                |                |
| White                                  | 390 (83.2)     | 170 (83.7)     | 401 (84.6)     | 395 (82.3)     | 216 (81.2)     |
| Black                                  | 58 (12.4)      | 26 (12.8)      | 65 (13.7)      | 63 (13.1)      | 41 (15.4)      |
| Asian                                  | 7 (1.5)        | 3 (1.5)        | 3 (0.6)        | 8 (1.7)        | 5 (1.9)        |
| Other                                  | 14 (3.0)       | 4 (2.0)        | 5 (1.1)        | 14 (2.9)       | 4 (1.5)        |

‡ Patients who had medical history of diabetes mellitus, hyperglycemia, insulin-requiring type 2 diabetes mellitus, type 1 diabetes mellitus, type 2 diabetes mellitus, or with baseline hemoglobin A1c  $\geq$ 6.5.

§ Patients with severe OA symptoms had a baseline WOMAC pain score  $\geq$ 7 on 11-point numeric rating scale, WOMAC physical function score  $\geq$ 7, and score of “poor” or “very poor” in the PGA of OA.

BMI, body mass index; NSAID, non-steroidal anti-inflammatory drug; OA, osteoarthritis; PGA, Patient’s Global Assessment; SD, standard deviation; WOMAC, Western Ontario and McMaster Universities Osteoarthritis Index

**Supplemental text S1:**

The patient was referred to a consulting neurologist for further evaluation if any of the following were reported:

- Any adverse event (AE) suggestive of new or worsening peripheral neuropathy\* or any AE of abnormal peripheral sensation (eg, allodynia, axonal neuropathy, burning sensation, decreased vibratory sense, demyelinating polyneuropathy, dysesthesia, formication, hyperesthesia, hyperpathia, hypoesthesia, hypoesthesia facial, hypoesthesia oral, intercostal neuralgia, neuralgia, neuritis, neuropathy peripheral, paresthesia, paresthesia oral, peripheral sensorimotor neuropathy, peripheral sensory neuropathy, polyneuropathy, polyneuropathy chronic, sensory disturbance, sensory loss, and thermohypoesthesia).
- Pain in the extremities suggestive of neuropathic pain.
- New or worsened clinically significant abnormality on the neurologic examination.

\*Though pre-existing neuropathy was an exclusionary criterion, there could be some cases in which a subject was considered not to have a peripheral neuropathy by the study investigator (who typically was a non-neurologist). If these subjects were randomized into a study and thereafter developed neurologic symptoms which required a neurology consultation, the neurologist's evaluation could indicate that the subject had a pre-existing neuropathy. In such cases, the patient would be considered to have worsened peripheral neuropathy.

**Supplemental Text S2:**

Standardized Medical Dictionary for Regulatory Activities (MedDRA) queries have not been developed to assess sympathetic nervous system function. Therefore, adverse events (AEs) described in conditions characterized by post-ganglionic sympathetic dysfunction were identified and designated as “decreased sympathetic function.” The identified AE terms were further categorized as those that may be indicative of cardiac-related decreased sympathetic function and those indicative of non–cardiac-related decreased sympathetic function.

Cardiac-related AEs included blood pressure orthostatic decreased, bradycardia, dizziness postural, heart rate decreased, orthostatic hypotension, presyncope, sinus bradycardia, and syncope. Non-cardiac-related AEs included anhidrosis, hypohidrosis, abdominal discomfort, diarrhea, early satiety, fecal incontinence, nausea, vomiting, ejaculation delay, ejaculation disorder, ejaculation failure, hypertonic bladder, micturition urgency, nocturia, urinary frequency, urinary hesitation, urinary incontinence, respiratory distress, and respiratory failure.
